# Supplementary material for: Remodeling the endoplasmic reticulum proteostasis network restores proteostasis of pathogenic GABAA receptors
Source: PubMed Central journal article supplement (PMC6258528; doi:10.1371/journal.pone.0207948), 2018-11-27
Supplement: pone.0207948.s001.pdf [file pone.0207948.s001.pdf]

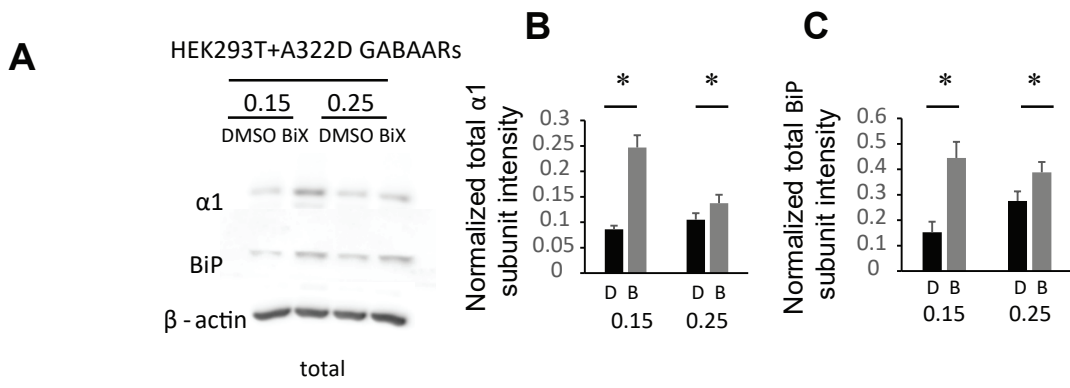

Supplementary Figure 1
